# Supplementary material for: M1-linked ubiquitination by LUBEL is required for inflammatory responses to oral infection in Drosophila
Source: PubMed Central journal article supplement (PMC6462001; doi:10.1038/s41418-018-0164-x), 2018-07-19
Supplement: 41418_2018_164_MOESM1_ESM.pdf [file 41418_2018_164_MOESM1_ESM.pdf]

# M1-linked ubiquitination by LUBEL is required for inflammatory responses to oral infection in *Drosophila*

Anna L. Aalto, Aravind K. Mohan, Lukas Schwintzer, Sebastian Kupka, Christa Kietz, Henning Walczak, Meike Broemer, Annika Meinander

## Supplementary Information

### Supplementary Figure 1. Structure of the *lubel* gene and analysis of *lubel* mutant flies.

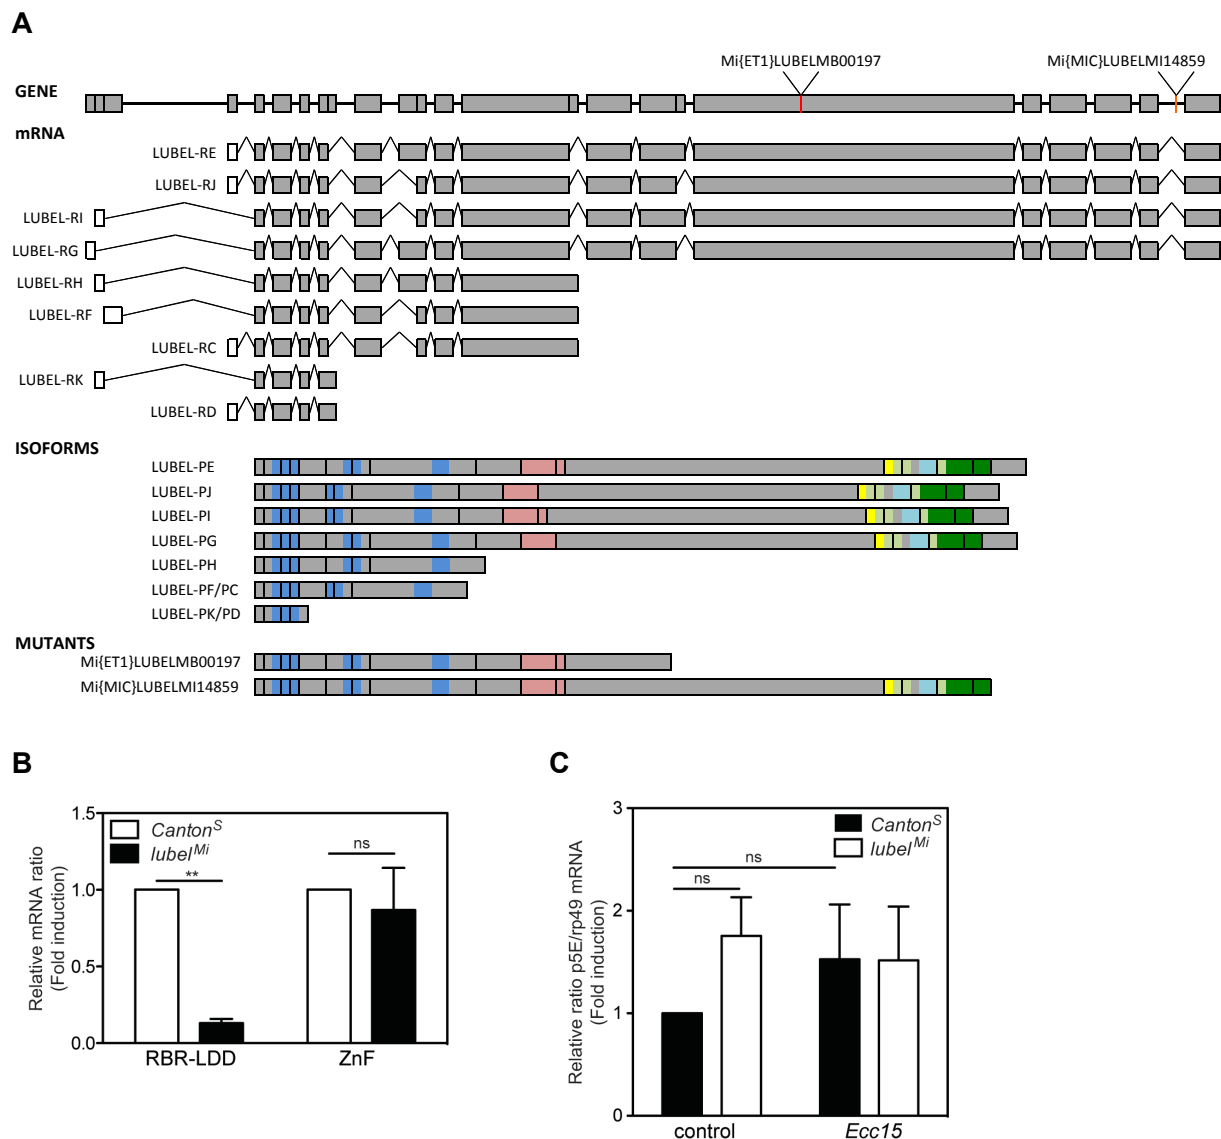

**(A)** Structure of the *lubel* gene, the transcribed mRNA variants, the expressed isoforms and the LUBEL proteins expressed in the *Mi{ET1}LUBELMB00197* and *Mi{MIC}LUBELMI14859* mutant *Drosophila* strains. The ZnFs are indicated in blue, UBA1 in red, UBA2 in yellow, the RING domains in light green, the IBR in light blue and the LDD in green. **(B)** Comparison of mRNA transcripts of the C-terminal RBR and third ZnF in wild type *Canton<sup>S</sup>* and *lubel<sup>Mi</sup>* mutant flies by qPCR. Error bars indicate SEM from 3 independent experimental repeats using at least 10 flies per repeat. **(C)** Ubiquitin mRNA levels were compared in *Canton<sup>S</sup>* and *lubel<sup>Mi</sup>* mutant flies by qPCR. The flies were either non-treated or subjected to septic injury with the Gram-negative bacteria *Ecc15*. Error bars indicate SEM from 3 independent experimental repeats using at least 10 flies per repeat.

**Supplementary Figure 2. The RBR-LDD of LUBEL selectively mediates M1-Ub chain formation.**

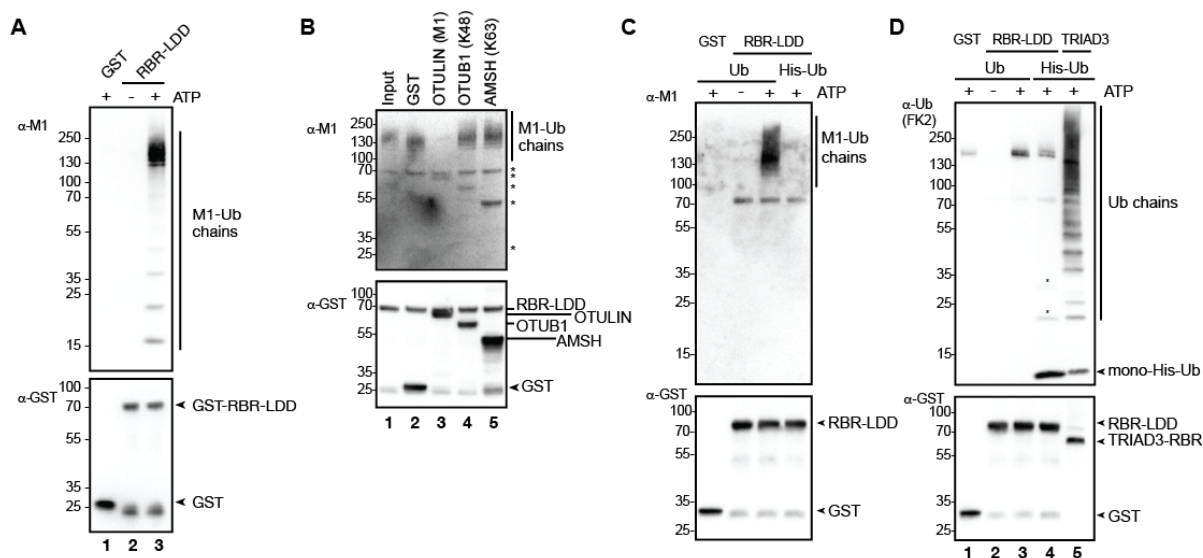

**(A)** GST-RBR-LDD fusion protein or GST protein were incubated in *in vitro*-ubiquitination reactions and samples were analysed by Western blotting using α-M1 and α-GST antibodies, n=3. **(B)** RBR-LDD-ligated Ub chains were analysed using UbiCRest and incubated with GST protein, OTULIN, OTUB1, or AMSH deubiquitinating enzyme, specific for M1, K48 or K63 chains, respectively. Western blot analysis with α-M1 and α-GST antibodies (\* in upper panel indicates unspecific bands of GST-fusion proteins), n=3. **(C,D)** GST-RBR-LDD, GST-TRIAD3-RBR or GST were incubated with ubiquitin or N-terminally blocked His-ubiquitin (His-Ub). Chain formation was analysed by Western blotting using α-M1 (C) and FK2 α-Ub antibody (D). TRIAD3-RBR efficiently synthesised Lys-linked chains with His-Ub, while RBR-LDD only catalysed low level-formation of di- and tri-His-Ub, indicated with asterisks. Lower panels show Western blot analysis using α-GST antibody, n=7.

**Supplementary Figure 3. The *Drosophila* Imd is not modified with M1-Ub chains.**

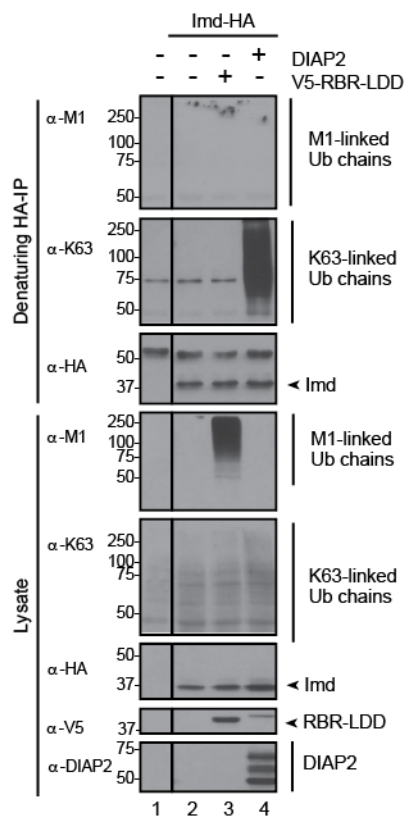

*Drosophila* S2 cells were transfected with empty vector, HA-tagged Imd and V5-tagged wild type LUBEL RBR-LDD or DIAP2. HA-immunoprecipitations were performed at denaturing conditions and the samples were analysed by Western blotting with α-M1, α-K63, α-HA, α-V5 and α-DIAP2 antibodies, n=3.

**Supplementary Figure 4. Analysis of *lubel* mutant flies and LUBEL transgenes.**

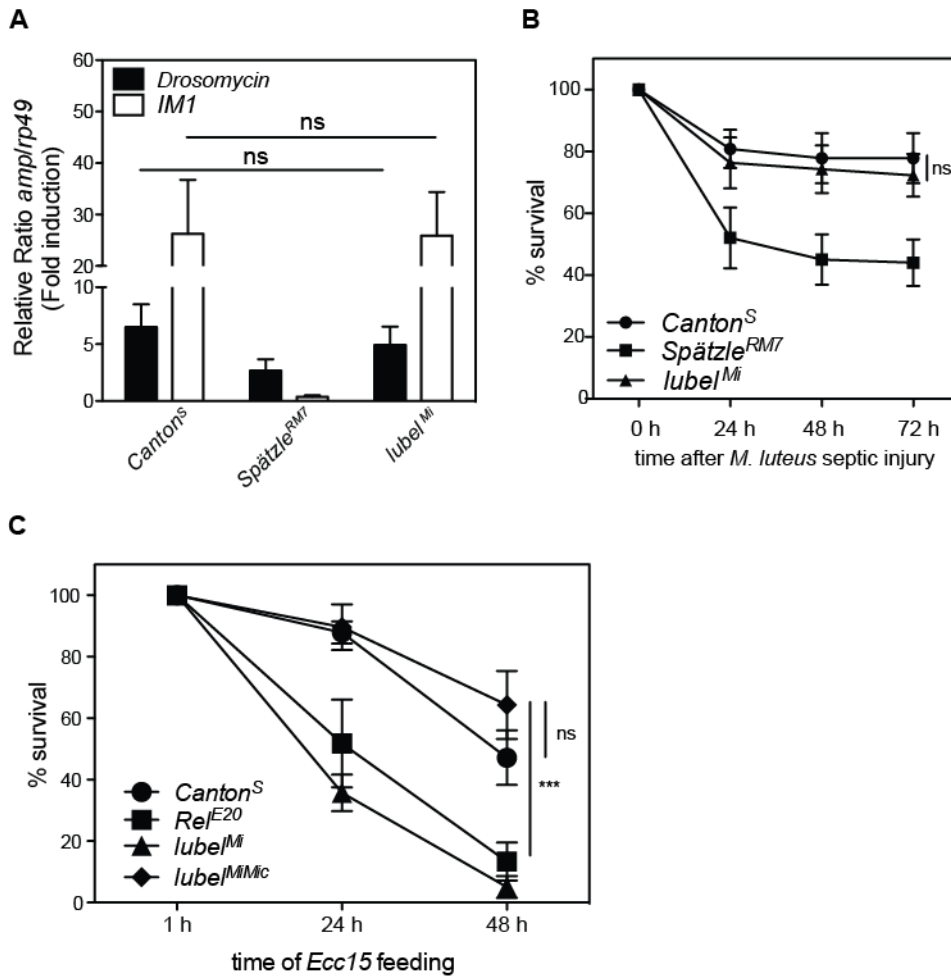

**(A)** The Toll pathway was induced in adult *Canton<sup>S</sup>*, *Spätzle<sup>RM7</sup>* and *lubel<sup>Mi</sup>* mutant flies by septic injury with the Gram-positive bacteria *M. luteus*. Dif activation was studied by analysing the expression of the AMPs *IM1* and *Drosomycin* with qPCR. *Spätzle<sup>RM7</sup>* mutant flies were used as negative controls. Error bars indicate SEM from 3 independent experimental repeats using at least 10 flies per repeat. **(B)** Adult wild type *Canton<sup>S</sup>* and *Spätzle<sup>RM7</sup>* and *lubel<sup>Mi</sup>* mutant flies were subjected to septic injury with the Gram-positive bacteria *M. luteus* and their survival was monitored over time. *Canton<sup>S</sup>* flies were used as wild type controls and *Spätzle<sup>RM7</sup>* mutant flies as negative controls. Error bars indicate SEM from 5 independent experimental repeats using at least 20 flies per repeat. **(C)** Adult *Canton<sup>S</sup>*, *Rel<sup>E20</sup>*, *lubel<sup>Mi</sup>* and *lubel<sup>MiMic</sup>* mutant flies were infected by feeding with the Gram-negative bacteria *Ecc15* and their survival was monitored over time. Error bars indicate SEM from 3 independent experimental repeats using at least 20 flies per repeat.
